# Supplementary material
Source: PubMed Central journal article supplement (PMC5154624)
Supplement: NIHMS829001-supplement-Supporting_Information.pdf [file NIHMS829001-supplement-Supporting_Information.pdf]

**Supporting Information for:**  
**The T296V Mutant of Amorpha-4,11-diene Synthase is Defective  
in Allylic Diphosphate Isomerization but Retains the Ability to  
Cyclize the Intermediate (3*R*)-Nerolidyl Diphosphate to  
Amorpha-4,11-diene**

Zhenqiu Li,<sup>†,\*</sup> Ruiping Gao,<sup>†</sup> Qinggang Hao,<sup>†</sup> Huifang Zhao,<sup>†</sup> Longbin Cheng,<sup>†</sup> Fang He,<sup>†</sup> Li Liu,<sup>‡</sup> Xiuhua Liu,<sup>†</sup> Wayne K. W. Chou,<sup>§</sup> Huajie Zhu,<sup>‡,\*</sup> and David E. Cane<sup>§,\*</sup>

<sup>†</sup>College of Life Sciences and <sup>‡</sup>College of Pharmacy, Hebei University, Wusi Dong Road #180, BAODING, 071002, CHINA, <sup>§</sup>Department of Chemistry, Box H, Brown University, Providence, Rhode Island 02912-9108, USA

**TABLE OF CONTENTS**

|                               |      |
|-------------------------------|------|
| Figures S1-S3.....            | p S2 |
| Figures S4-S6 .....           | p S3 |
| Scheme S1, Figures S7-S8..... | p S4 |
| Figures S9-S11 .....          | p S5 |
| Table S1.....                 | p S6 |

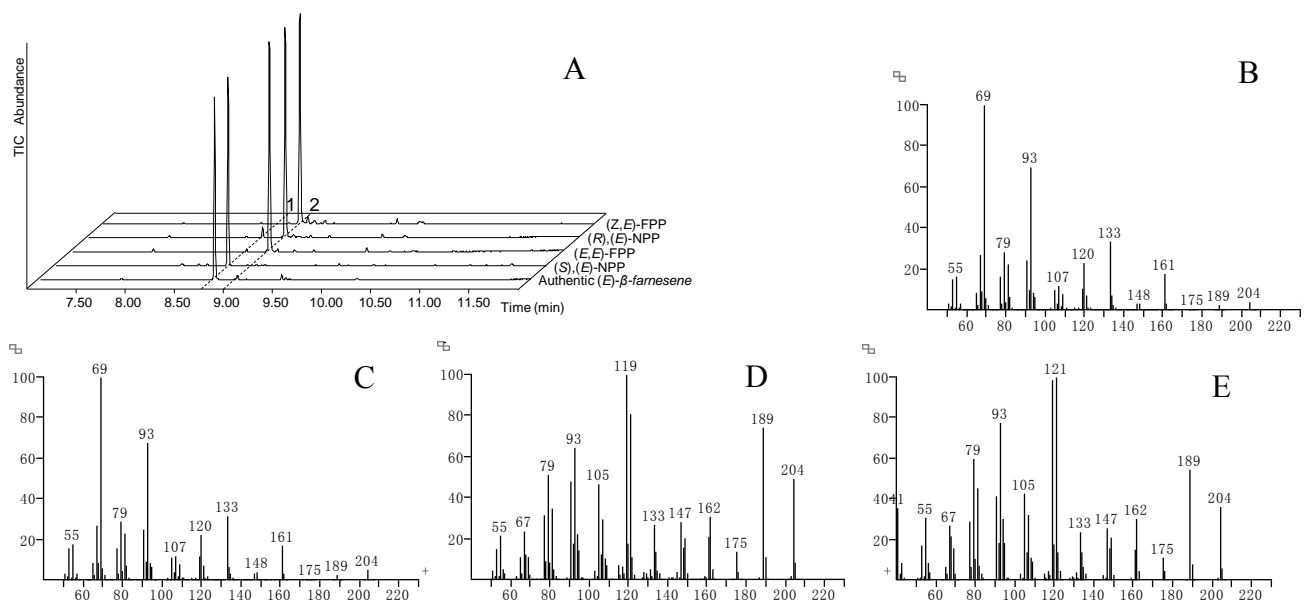

**Figure S1.** GC-MS analysis of authentic (*E*)- $\beta$ -farnesene and products of ADS wild type using (*E,E*)-FPP, (*Z,E*)-FPP, (*R*),(*E*)-NPP and (*S*),(*E*)-NPP as substrates. A: Total ion chromatogram, B: MS spectrum of authentic (*E*)- $\beta$ -farnesene peak 1; C: MS spectrum of peak 1 in A-(*S*),(*E*)-NPP; D: MS spectrum of peak 2 in A-(*E,E*)-FPP, (*Z,E*)-FPP and (*R*),(*E*)-NPP products; E: MS spectrum of amorpha-4,11-diene standard from MassFinder 4

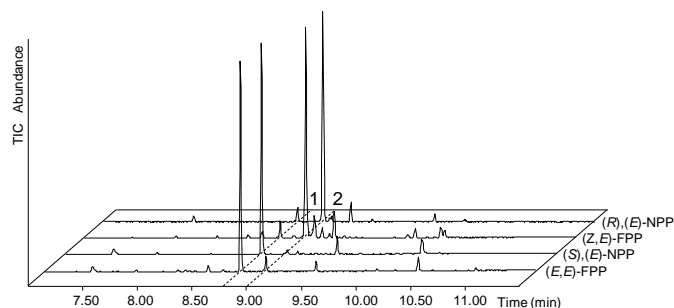

**Figure S2.** GC-MS TIC of ADS T296V mutant products using (*E,E*)-FPP, (*Z,E*)-FPP, (*R*),(*E*)-NPP and (*S*),(*E*)-NPP as substrates. Peak 1: (*E*)- $\beta$ -farnesene; 2: amorpha-4,11-diene

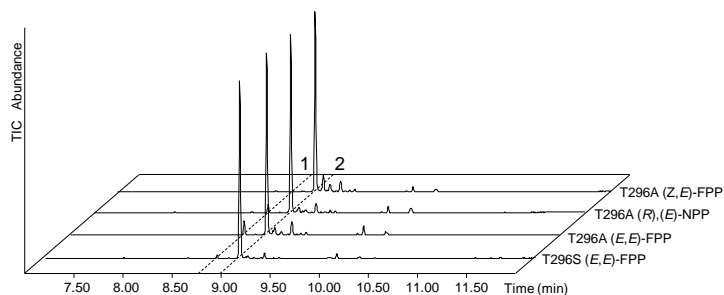

**Figure S3.** GCMS TIC of ADS T296S and T296A mutant products using (*E,E*)-FPP, or (*Z,E*)-FPP and (*R*),(*E*)-NPP as substrates. Peak 1: (*E*)- $\beta$ -farnesene; 2: amorpha-4,11-diene

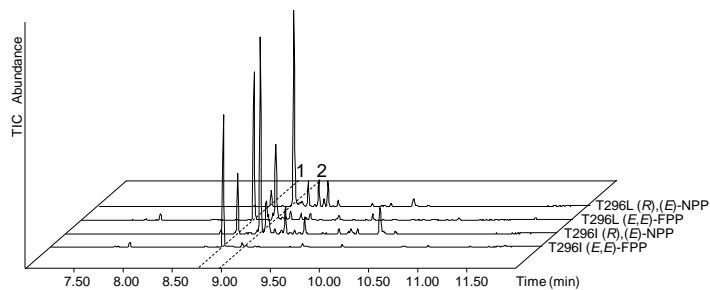

**Figure S4.** GCMS TIC of ADS T296I and T296L mutant products using (*E,E*)-FPP, and (*R*),(*E*)-NPP as substrates. Peak 1: (*E*)- $\beta$ -farnesene; 2: amorpha-4,11-diene

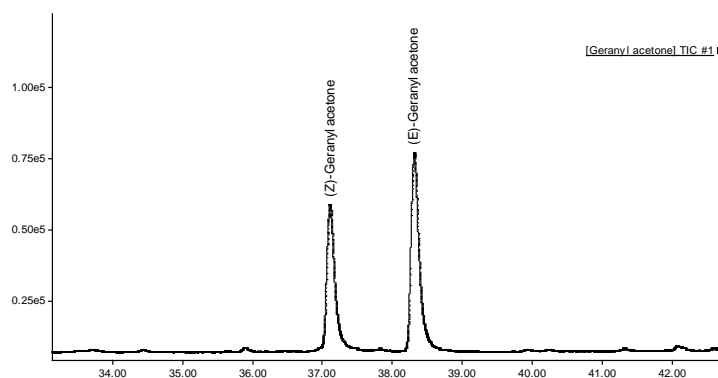

**Figure S5.** GC FID chromatograms of commercial geranyl acetone

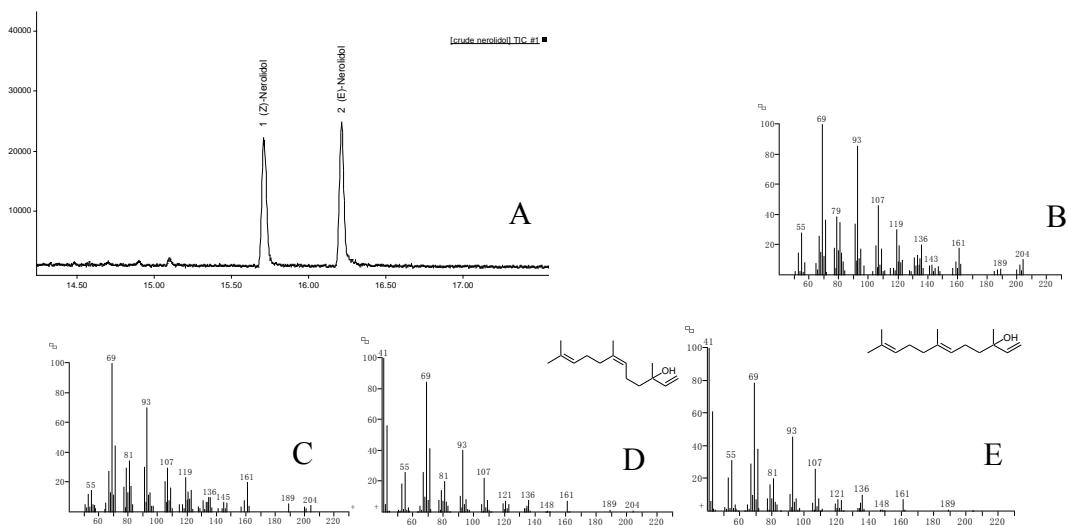

**Figure S6.** GC-MS total ion chromatogram of crude nerolidol and MS spectra of purified nerolidol and nerolidol isomers from the Massfinder 4 Library. A: TIC. B: MS spectrum of peak 1 in A. C: MS spectrum of peak 2 in A. D: MS spectrum of (*Z*)-nerolidol standard from MassFinder 4. E: MS spectrum of (*E*)-nerolidol standard from MassFinder 4.

**Scheme S1.** Synthesis of (*R*),(*E*)-nerolidyl diphosphate

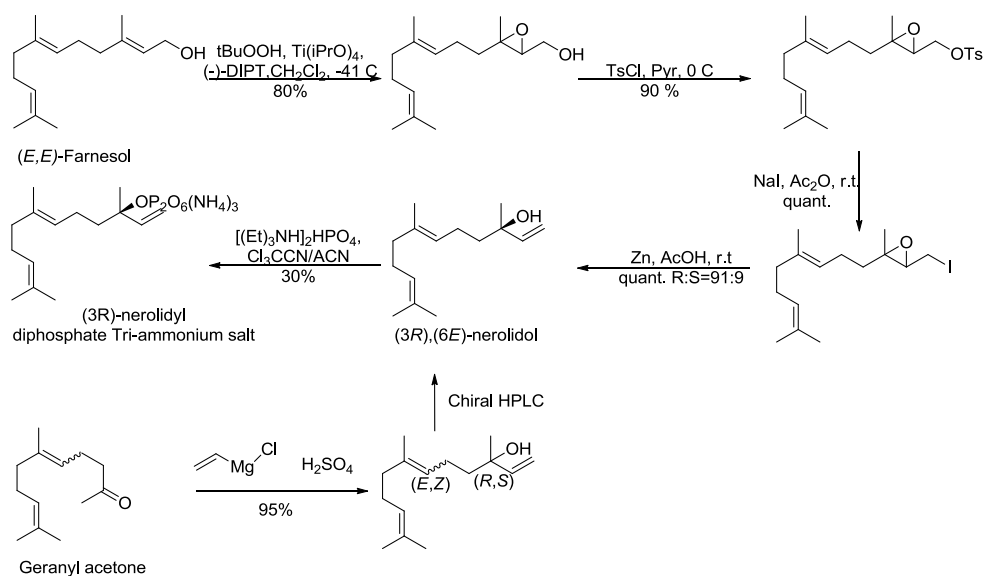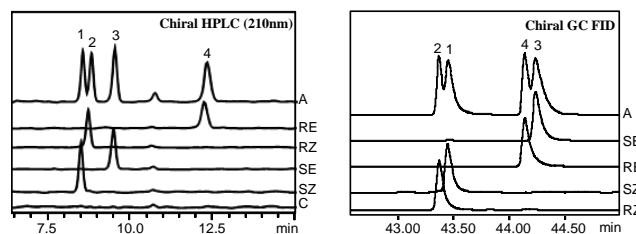

**Figure S7.** Chiral chromatogram of nerolidol purified using chiral HPLC 1: (3*S*, *Z*)-nerolidol ( $[\alpha]_D^{20}=+16.5$  in dichloromethane); 2: (3*R*, *Z*)-nerolidol; 3: (3*S*, *E*)-nerolidol; 4: (3*R*, *E*)-nerolidol ( $[\alpha]_D^{20}=-15.7$  in dichloromethane); A: crude synthetic nerolidol; C: Petroleum ether.

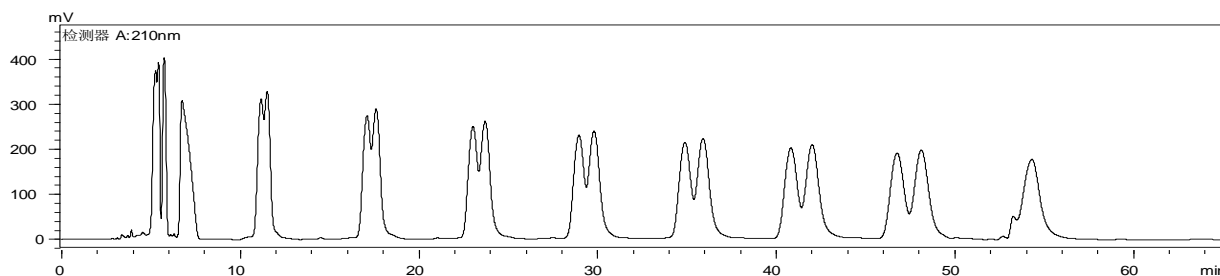

**Figure S8.** Chromatogram of one run in the preparation of optically pure (3*R*, *E*)-nerolidol by HPLC in the circulating mode.

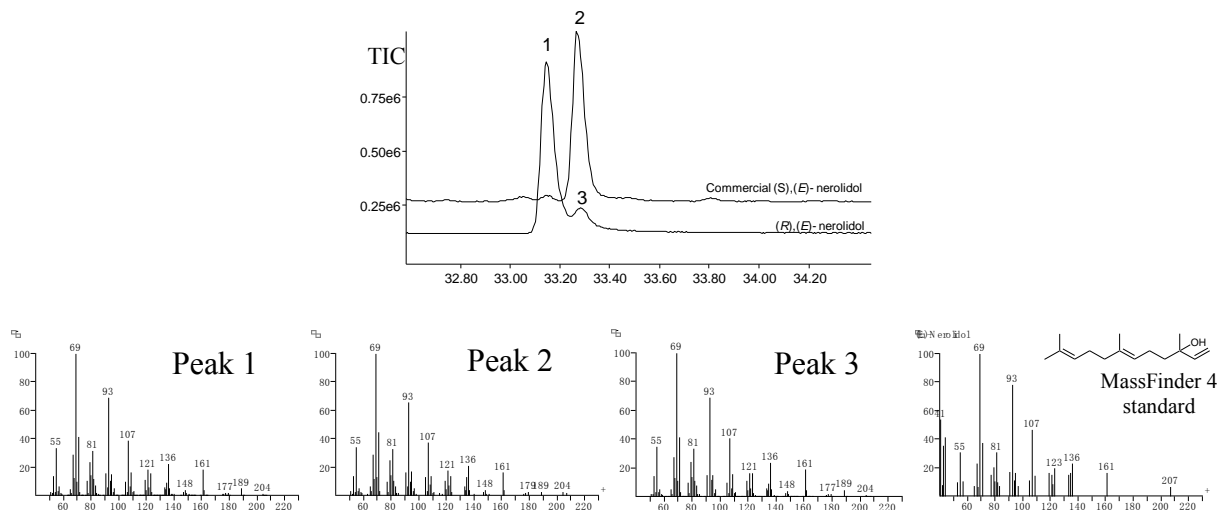

**Figure S9.** Chiral GC-MS analysis of commercial (3*S*, *E*)-nerolidol and of (3*R*, *E*)-nerolidol synthesized from geranyl acetone and 2,3-epoxyfarnesol by the Sharpless epoxidation method

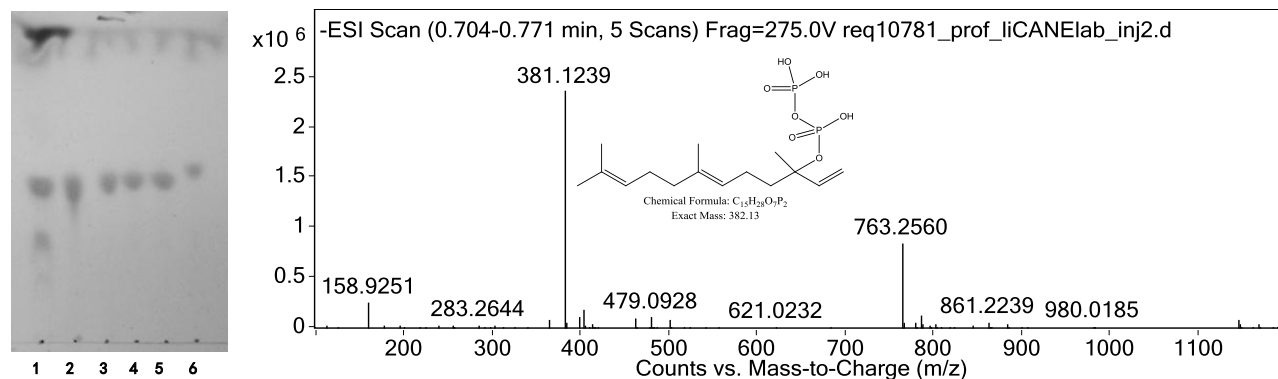

**Figure S10.** TLC and LC-MS analysis of synthesized nerolidyl diphosphate. Left: TLC 1: crude (3*R*, *E*)-nerolidyl diphosphate, 2: commercial (3*S*, *E*)-nerolidyl diphosphate; 3: (3*R*, *E*)-nerolidyl diphosphate; 4: (3*R*, *Z*)-nerolidyl diphosphate, 5: (3*S*, *Z*)-nerolidyl diphosphate; 6: commercial (2*E*, 6*E*)-farnesyl diphosphate. Right: LC-MS spectrum of (3*R*, *E*)-nerolidyl diphosphate

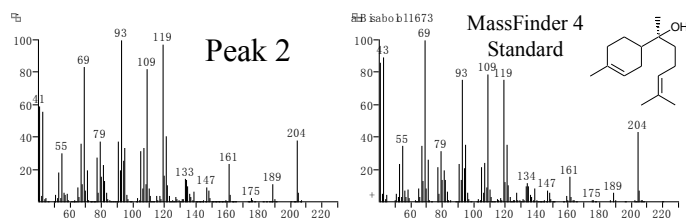

**Figure S11.** MS spectra of peak 2 in Figure 4 and  $\alpha$ -bisabolol standard from Massfinder 4

**Table S1.** Mutagenic primers used for construction of ADS and AaBOS mutants

| <b>Name</b>   | <b>Sequence(5' --- 3')</b>        |
|---------------|-----------------------------------|
| ADS-T296V-F   | TGTTGCTGTTATAGTTCTTATAGATGAC      |
| ADS-T296V-R   | GTCATCTATAAGAACTATAACAGCAACA      |
| ADS-T296L-F   | TGTTGCTGTTATACTTCTTATAGATGAC      |
| ADS-T296L-R   | GTCATCTATAAGAAGTATAACAGCAACA      |
| ADS-T296A-F   | CTGTTGCTGTTATAGCTCTTATAGATGAC     |
| ADS-T296A-R   | GTCATCTATAAGAGCTATAACAGCAACAG     |
| ADS-T296I-F   | TGTTGCTGTTATAATTCTTATAGATGACA     |
| ADS-T296I-R   | TGTCATCTATAAGAATTATAACAGCAACA     |
| ADS-T296S-F   | CTGTTGCTGTTATATCTCTTATAGATGAC     |
| ADS-T296S-R   | GTCATCTATAAGAGATATAACAGCAACAG     |
| AaBOS-T296V-F | GTTATTGCGCTGGTTGTGCTGATTGATGACATC |
| AaBOS-T296V-R | GATGTCATCAATCAGCACAACCAGCGCAATAAC |
